# Supplementary material for: Carbon nanofibers containing Si nanoparticles and graphene-covered Ni for high performance anodes in Li ion batteries
Source: Royal Society of Chemistry journal article supplement (doi:10.1039/c4ra03066d), 2014-01-01
Supplement: c4ra03066d1.pdf [file c4ra03066d1.pdf]

## Supplementary Information

### Carbon nanofibers containing Si nanoparticles and graphene-encapsulated Ni for high performance anodes in Li ion batteries

Zheng-Long XU, Biao ZHANG, Zi-Qi ZHOU, Sara ABOUALI, Mohammad AKBARI  
KARAKANI, Jiaqiang HUANG, Jianqiu HUANG and Jang-Kyo KIM\*

Department of Mechanical Aerospace Engineering, The Hong Kong University of  
Science and Technology, Clear Water Bay, Kowloon, Hong Kong

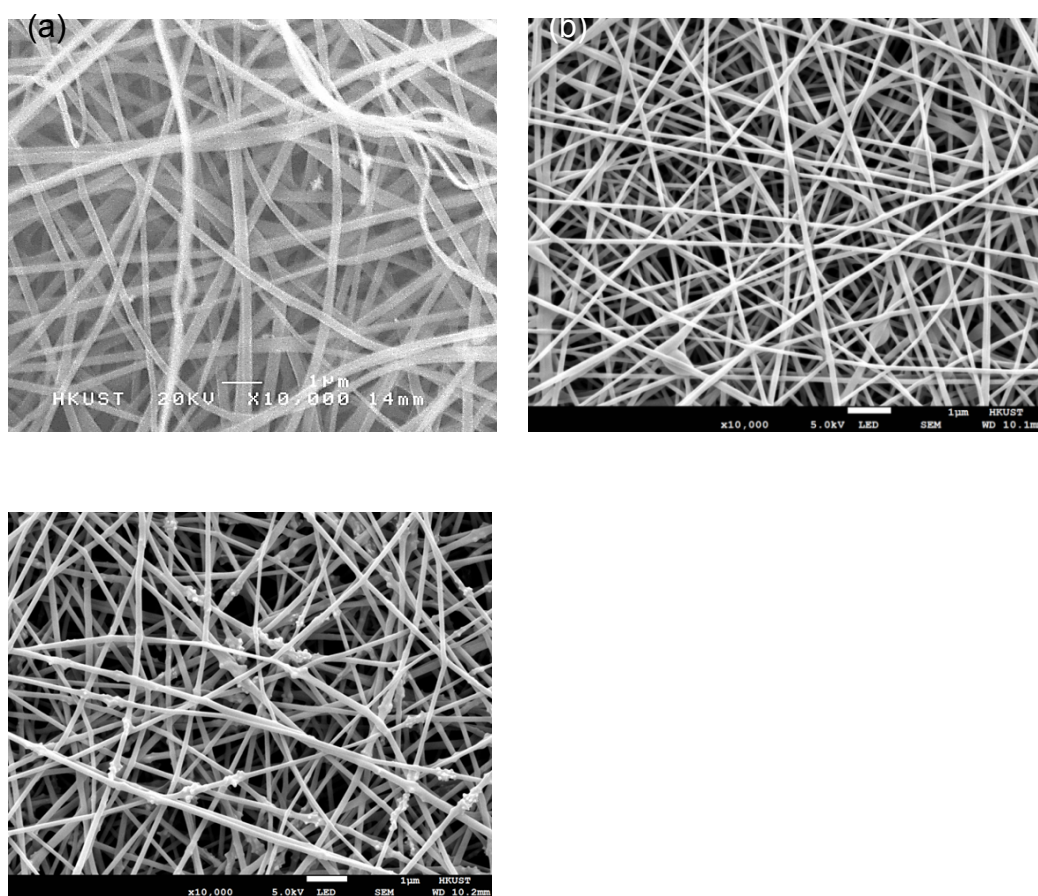

**Fig. S1** SEM images of as-spun nanofibers of (a) Ni/PVA, (b) PVA, and (c) Si/Ni/PVA.

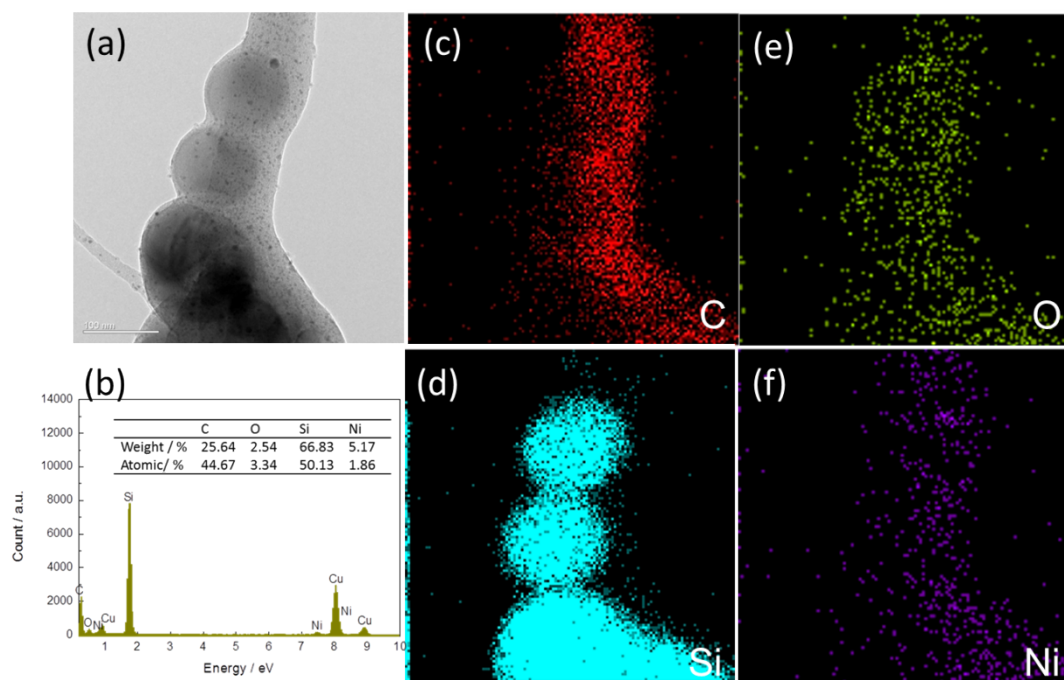

**Fig. S2** Structure and characteristics of Si/Ni/CNF composites: (a) TEM image; (b) EDS of (a); (c-f) element mappings of C, Si, O and Ni, respectively.

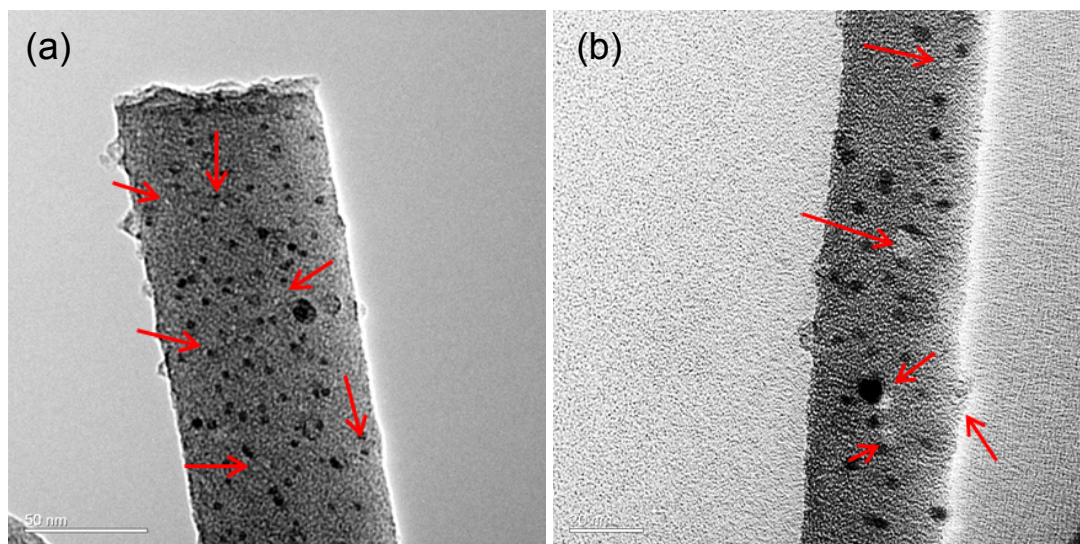

**Fig. S3** TEM image of pores in Ni/CNF (in red arrows).

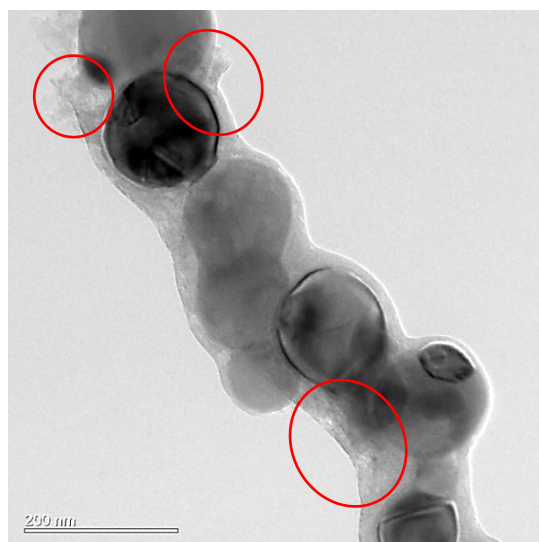

**Fig. S4** TEM images of Si/CNF/Ni-etch composite: damaged CNF matrix (red circles)

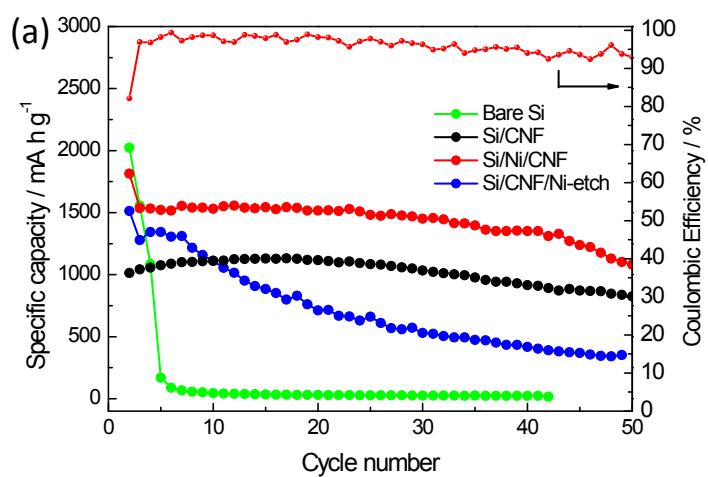

**Fig. S5** Cyclic test results of electrodes made from neat Si, Si/CNF, Si/Ni/CNF and Si/CNF/Ni-etch at a current density  $100 \text{ mA g}^{-1}$  between 0 and 3 V.
